# Supplementary material for: Eccentric hypertrophy in an animal model of mid- and long-term premature ventricular contraction–induced cardiomyopathy
Source: PubMed Central journal article supplement — Heart Rhythm O2. 2021 Jan 8;2(1):80–8. doi: 10.1016/j.hroo.2020.12.021 (PMC8183810; doi:10.1016/j.hroo.2020.12.021), 2021-01-08
Supplement: mmc1.pdf [file mmc1.pdf]

## SUPPLEMENTAL MATERIAL

**Supplemental Table 1.** Ambulatory ECG Holter data of sham and bigeminal PACs and PVCs.

|                      | Sham (n=9)      | PAC (n=7)          | PVC (n=11)           | P-value |
|----------------------|-----------------|--------------------|----------------------|---------|
| <b>Mean HR (bpm)</b> | 99.0±1.4        | 119.1±3.2*         | 122.5±4.4*           | <0.001  |
| <b>PACs no. (%)</b>  | 4770±1447 (3.5) | 64865±8015 (40.1)* | 106±37 (0.5)†        | <0.001  |
| <b>PVCs no. (%)</b>  | 745±257 (1)     | 1.1±1 (0.4)        | 86499±11636 (49.8)*† | <0.001  |

Footnote: Values are mean ± SEM. % indicates the percentage of PACs or PVCs (“burden”) of the total beat count during 24-hr Holter monitoring. Multiple comparison test: \* and † indicate p<0.05 vs. sham and PAC groups, respectively. HR: Heart rate; PAC: premature atrial contraction; PVC: premature ventricular contraction.

**Supplemental Table 2.** Echocardiographic parameters of sham, PAC and PVC groups during the 12-week protocol.

|                    | <b>Sham (n=9)</b> | <b>PAC (n=7)</b> | <b>PVC (n=11)</b> | <b>p-value</b>    |
|--------------------|-------------------|------------------|-------------------|-------------------|
| <b>LVEF (%)</b>    |                   |                  |                   | <b>&lt;0.0001</b> |
| Baseline           | 60.0 ± 1.1        | 62.9 ± 1.7       | 61.4 ± 0.5        |                   |
| Week-4             | 57.7 ± 0.9        | 59.9 ± 1.8       | 50.2 ± 1.5        | *†‡               |
| Week-8             | 58.4 ± 1.3        | 56.6 ± 1.8       | 44.9 ± 1.9        | *†‡               |
| Week-12            | 58.8 ± 0.9        | 56.1 ± 1.9       | 44.2 ± 1.7        | *†‡§              |
| <b>LVEDV (mL)</b>  |                   |                  |                   | <b>&lt;0.0001</b> |
| Baseline           | 50.9 ± 2.4        | 50.4 ± 1.6       | 50.6 ± 1.2        |                   |
| Week-4             | 49.4 ± 2.4        | 53.6 ± 2.0       | 56.1 ± 1.8        | ‡                 |
| Week-8             | 51.1 ± 2.8        | 48.7 ± 1.9       | 61.9 ± 3.0        | *†‡               |
| Week-12            | 51.7 ± 2.1        | 51.3 ± 1.7       | 64.5 ± 2.1        | *†‡§              |
| <b>LVESV (mL)</b>  |                   |                  |                   | <b>&lt;0.0001</b> |
| Baseline           | 20.6 ± 1.2        | 18.4 ± 0.7       | 19.5 ± 0.5        |                   |
| Week-4             | 21.2 ± 0.9        | 21.6 ± 0.6       | 28.1 ± 1.6        | *†‡               |
| Week-8             | 21.1 ± 1.6        | 21.1 ± 1.1       | 32.5 ± 2.4        | *†‡               |
| Week-12            | 21.3 ± 0.8        | 22.4 ± 1.5       | 35.9 ± 1.9        | *†‡§              |
| <b>IVSEDD (cm)</b> |                   |                  |                   | 0.699             |
| Baseline           | 0.90 ± 0.02       | 0.89 ± 0.05      | 0.91 ± 0.02       |                   |
| Week-4             | 0.91 ± 0.03       | 0.86 ± 0.03      | 0.89 ± 0.03       |                   |
| Week-8             | 0.89 ± 0.04       | 0.89 ± 0.05      | 0.96 ± 0.03       |                   |
| Week-12            | 0.92 ± 0.04       | 0.93 ± 0.04      | 0.98 ± 0.03       |                   |
| <b>PWEDD (cm)</b>  |                   |                  |                   | 0.990             |
| Baseline           | 0.89 ± 0.03       | 0.84 ± 0.05      | 0.85 ± 0.03       |                   |
| Week-4             | 0.88 ± 0.01       | 0.83 ± 0.03      | 0.87 ± 0.04       |                   |
| Week-8             | 0.91 ± 0.04       | 0.84 ± 0.05      | 0.86 ± 0.04       |                   |

|                   |             |               |                 |                  |
|-------------------|-------------|---------------|-----------------|------------------|
| Week-12           | 0.87 ± 0.02 | 0.83 ± 0.03   | 0.85 ± 0.05     |                  |
| <b>LVEDD (cm)</b> |             |               |                 | <b>&lt;0.010</b> |
| Baseline          | 3.91 ± 0.12 | 3.83 ± 0.12   | 3.87 ± 0.10     |                  |
| Week-4            | 3.98 ± 0.12 | 3.99 ± 0.15   | 4.30 ± 0.14 ‡   |                  |
| Week-8            | 3.99 ± 0.11 | 3.87 ± 0.15   | 4.36 ± 0.17     |                  |
| Week-12           | 3.90 ± 0.08 | 3.81 ± 0.15   | 4.55 ± 0.13 *†‡ |                  |
| <b>LVESD (cm)</b> |             |               |                 | <b>&lt;0.001</b> |
| Baseline          | 2.40 ± 0.12 | 2.40 ± 0.12   | 2.55 ± 0.07     |                  |
| Week-4            | 2.52 ± 0.11 | 2.70 ± 0.11 ‡ | 3.08 ± 0.13 *‡  |                  |
| Week-8            | 2.48 ± 0.08 | 2.63 ± 0.13   | 3.17 ± 0.14 *†‡ |                  |
| Week-12           | 2.54 ± 0.09 | 2.61 ± 0.09   | 3.37 ± 0.11 *†‡ |                  |
| <b>E/A ratio</b>  |             |               |                 | 0.661            |
| Baseline          | 1.7 ± 0.1   | 1.8 ± 0.2     | 1.7 ± 0.1       |                  |
| Week-4            | 1.7 ± 0.1   | 1.8 ± 0.1     | 1.4 ± 0.1       |                  |
| Week-8            | 1.7 ± 0.1   | 1.8 ± 0.1     | 1.4 ± 0.2 †     |                  |
| Week-12           | 1.6 ± 0.1   | 1.9 ± 0.2     | 1.4 ± 0.1 †     |                  |

Footnote: Values are mean ± SEM. Multiple comparison test (p<0.05): \* vs sham, † vs PAC, ‡ vs baseline and § vs week-4. PAC: premature atrial contraction; PVC: premature ventricular contraction; LVEF: left ventricular ejection fraction; LVEDV: left ventricular end-diastolic volume; LVESV: left ventricular end-systolic volume; IVSEDD: interventricular end-diastolic dimension; PWEDD: posterior wall end-diastolic dimension; LVEDD: left ventricular end-diastolic dimension; LVESD: left ventricular end-systolic dimension; E/A: mitral ratio of peak early to late diastolic filling velocity.

**Supplemental Table 3.** Left ventricular RWT and mass index (estimated by 2 methods) of sham, PAC and PVC groups during the 12-week protocol.

|                                            | <b>Sham<br/>(n=9)</b> | <b>PAC (n=7)</b> | <b>PVC<br/>(n=11)</b> | <b>p-value</b>    |
|--------------------------------------------|-----------------------|------------------|-----------------------|-------------------|
| <b>LV Mass index (Linear method, g/kg)</b> |                       |                  |                       | <b>&lt;0.001</b>  |
| Baseline                                   | 4.8 ±0.3              | 4.6 ±0.3         | 4.6 ±0.3              |                   |
| Week-4                                     | 4.9 ±0.2              | 4.7 ±0.3         | 5.5 ±0.5 ‡            |                   |
| Week-8                                     | 5.0 ±0.3              | 4.7 ±0.3         | 5.9 ±0.5 ‡            |                   |
| Week-12                                    | 4.8 ±0.2              | 4.7 ±0.3         | 6.3 ±0.5 *†‡§         |                   |
| <b>LV Mass index (Area-length, g/kg)</b>   |                       |                  |                       | <b>&lt;0.0001</b> |
| Baseline                                   | 3.7 ±0.1              | 3.5 ±0.1         | 3.6 ±0.2              |                   |
| Week-4                                     | 3.7 ±0.1              | 3.6 ±0.1         | 4.0 ±0.2 ‡            |                   |
| Week-8                                     | 3.7 ±0.2              | 3.7 ±0.2         | 4.3 ±0.2 ‡§           |                   |
| Week-12                                    | 3.8 ±0.1              | 3.8 ±0.1         | 4.5 ±0.2 *†‡§         |                   |
| <b>RWT</b>                                 |                       |                  |                       | 0.642             |
| Baseline                                   | 0.46 ±0.02            | 0.44 ±0.03       | 0.44 ±0.02            |                   |
| Week-4                                     | 0.45 ±0.02            | 0.42 ±0.03       | 0.41 ±0.01            |                   |
| Week-8                                     | 0.46 ±0.02            | 0.44 ±0.04       | 0.40 ±0.02            |                   |
| Week-12                                    | 0.45 ±0.01            | 0.44 ±0.03       | 0.37 ±0.02 *‡         |                   |

Footnote: Values are mean ± SEM. Multiple comparison test (p<0.05): \* vs sham, † vs PAC, ‡ vs baseline and § vs week-4. PAC: premature atrial contraction; PVC: premature ventricular contraction; LV: left ventricle; RWT: relative wall thickness.

**Supplemental Figure 1.** Echocardiographic views, methods and parameters to assess left ventricular function and structure.

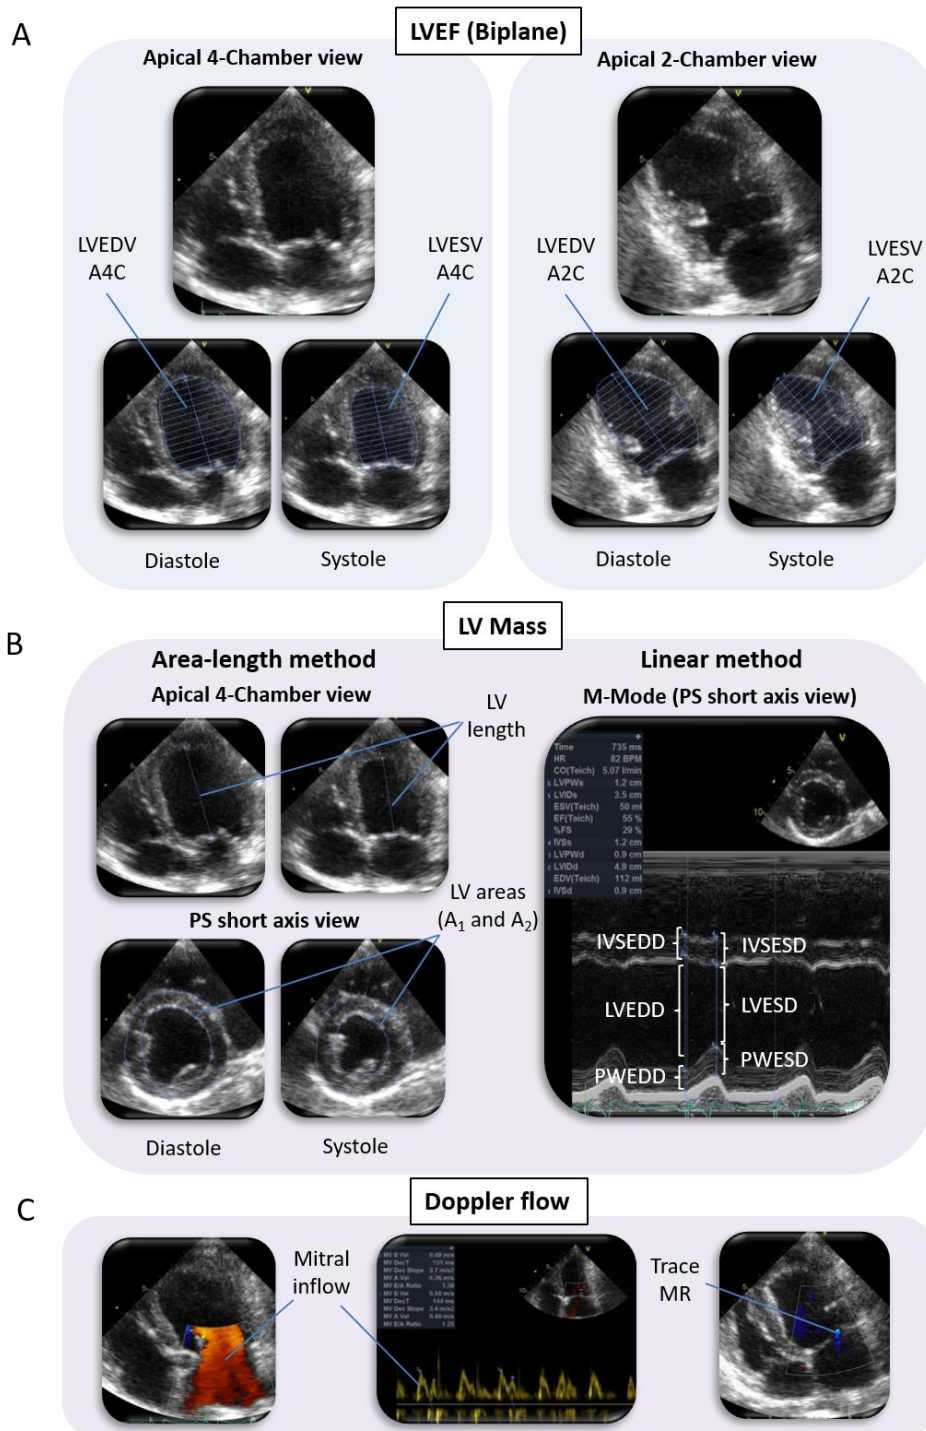

Footnote: (A). LVEF was quantified using the biplane method of disks (modified Simpson's rule), based on the acquisition of images of the LV from the apical 4- and 2-chamber views. (B). LV mass was estimated by two methods: (Right) Linear method, based in the Cube formula and LV linear dimensions

derived with a two-dimensional echocardiography-guided M-mode approach in the PS short-axis view at the level of the papillary muscles; (Left) Area-length method, which is based in the Area-length formula and the assessment of epicardial ( $A_1$ ) and endocardial ( $A_2$ ) cross-sectional areas obtained in the PS short-axis view (with the papillary muscles considered part of the LV cavity). LV cavity length is measured in 4 apical-chamber view as the distance from apex to the mid mitral annulus plane (see text for more details). LV cross-sectional areas and lengths were obtained at systole and diastole and averaged. (C). Doppler-ultrasound techniques (i.e., pulsed-wave and color flow imaging) were performed to measure the mitral inflow velocities and to evaluate for MR. LVEF: left ventricular ejection fraction; LVEDV: left ventricular end-diastolic volume; LVESV: left ventricular end-systolic volume; A4C and A2C: apical 4- and 2-chamber view, respectively; LV: left ventricle; PS: parasternal; IVSEDD: interventricular septal end-diastolic dimension; LVEDD: left ventricular end-diastolic dimension; PWEDD: posterior wall end-diastolic dimension; IVSESD: interventricular septal end-systolic dimension; LVESD: left ventricular end-systolic dimension; PWESD: posterior wall end-systolic dimension; MR: mitral regurgitation.

**Supplemental Figure 2.** Changes in LV linear dimensions assessed by M-mode echocardiography in the study groups over the 12-week protocol.

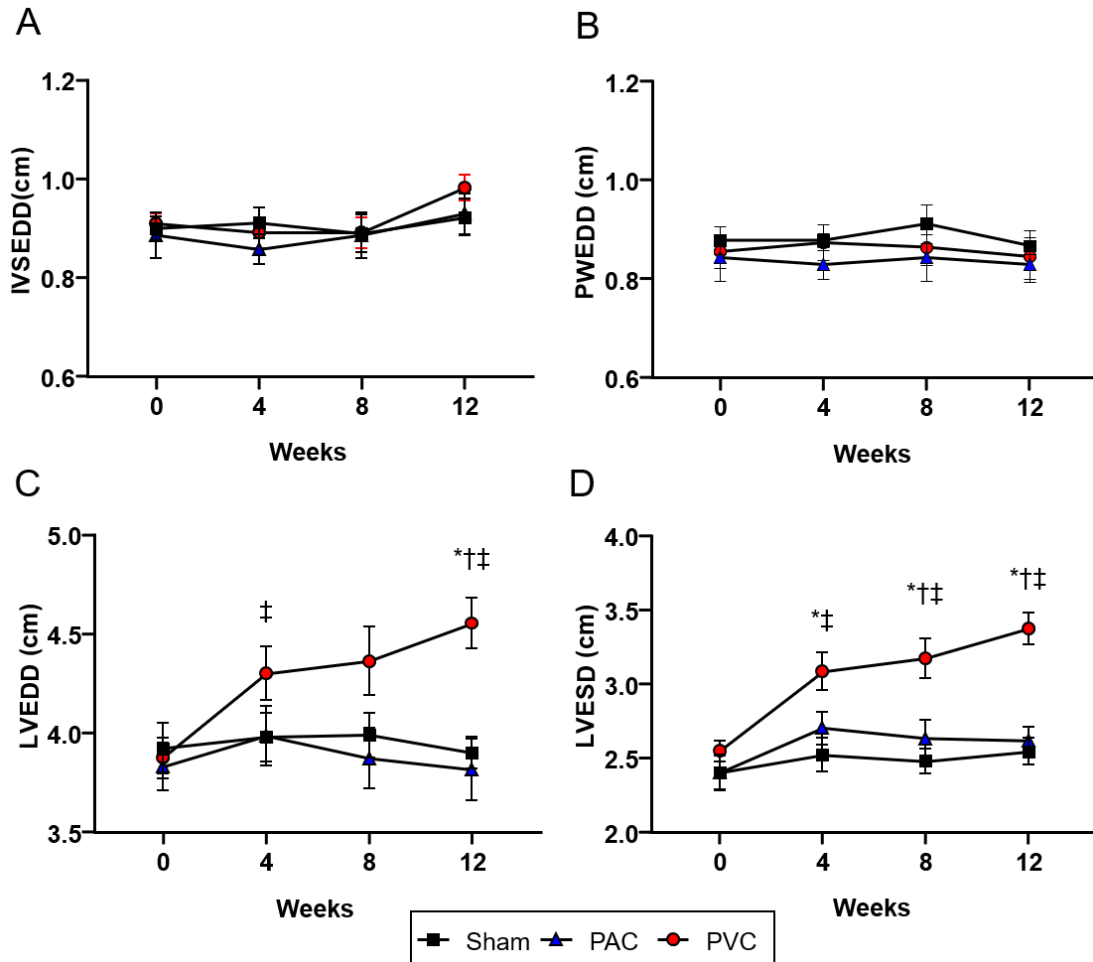

Footnote: LV: left ventricle; PVC: premature ventricular contraction; PAC: premature atrial contraction; IVSEDD: interventricular septal end-diastolic dimension; PWEDD: posterior wall end-diastolic dimension; LVEDD: left ventricular end-diastolic dimension; LVESD: left ventricular end-systolic dimension.

**Supplemental Figure 3.** Changes in LV mass index in the study groups during the 12-week protocol assessed by the Area-length method and its correlation with the Linear method.

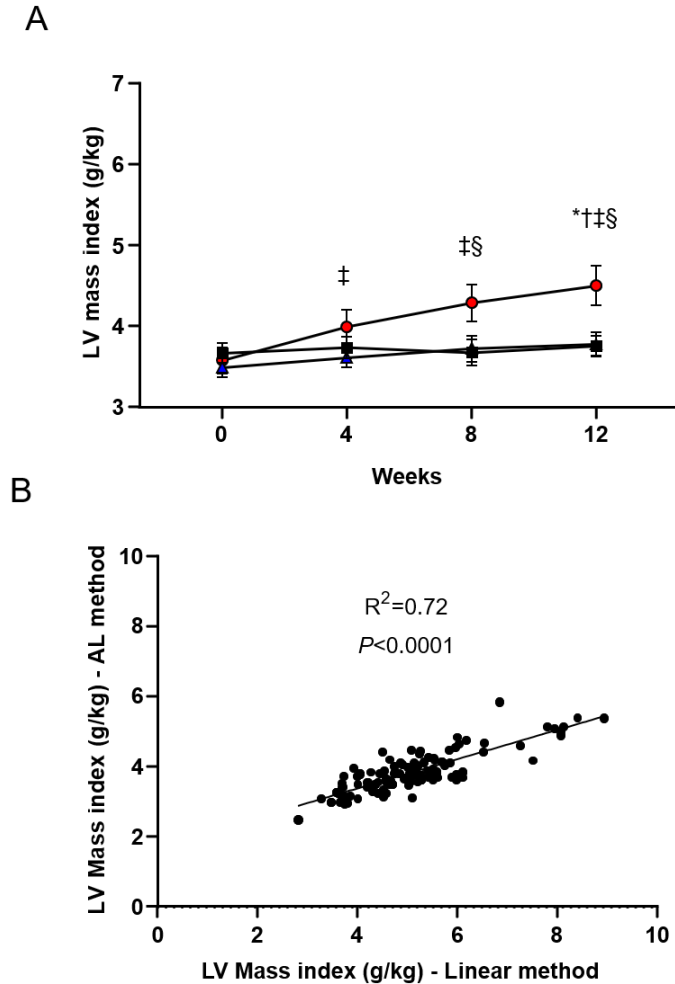

Footnote: (A). The progressive increase in LV mass index induced by PVC bigeminy during the 12-week protocol (Figure 4A) was corroborated by the Area-length method, whose values are independently derived to those obtained by the Linear method. (B). Correlation between the two echocardiographic methods by plotting all values of the study groups at all time points. These two methods showed a positive and significant correlation ( $R^2=0.72$ ;  $P<0.0001$ ). Note that absolute values of LV mass index gathered by the Linear method were higher than those estimations obtained by the area-length method. For more detailed information see the text. LV: left ventricle; AL: area-length.
